# Supplementary material for: Clay illuviation provides a long-term sink for C sequestration in subsoils
Source: PubMed Central journal article supplement (PMC5382536; doi:10.1038/srep45635), 2017-04-06

**Clay illuviation provides a long-term sink for C sequestration in subsoils.**  
Torres-Sallan, G., Schulte, R.P.O, Lanigan, G.J., Byrne, K.A., Reidy, B., Simo, I., Six, J.,  
Creamer, R.E.

**Supplementary Information**

**Figure SI1. Soil aggregate structure diagram**

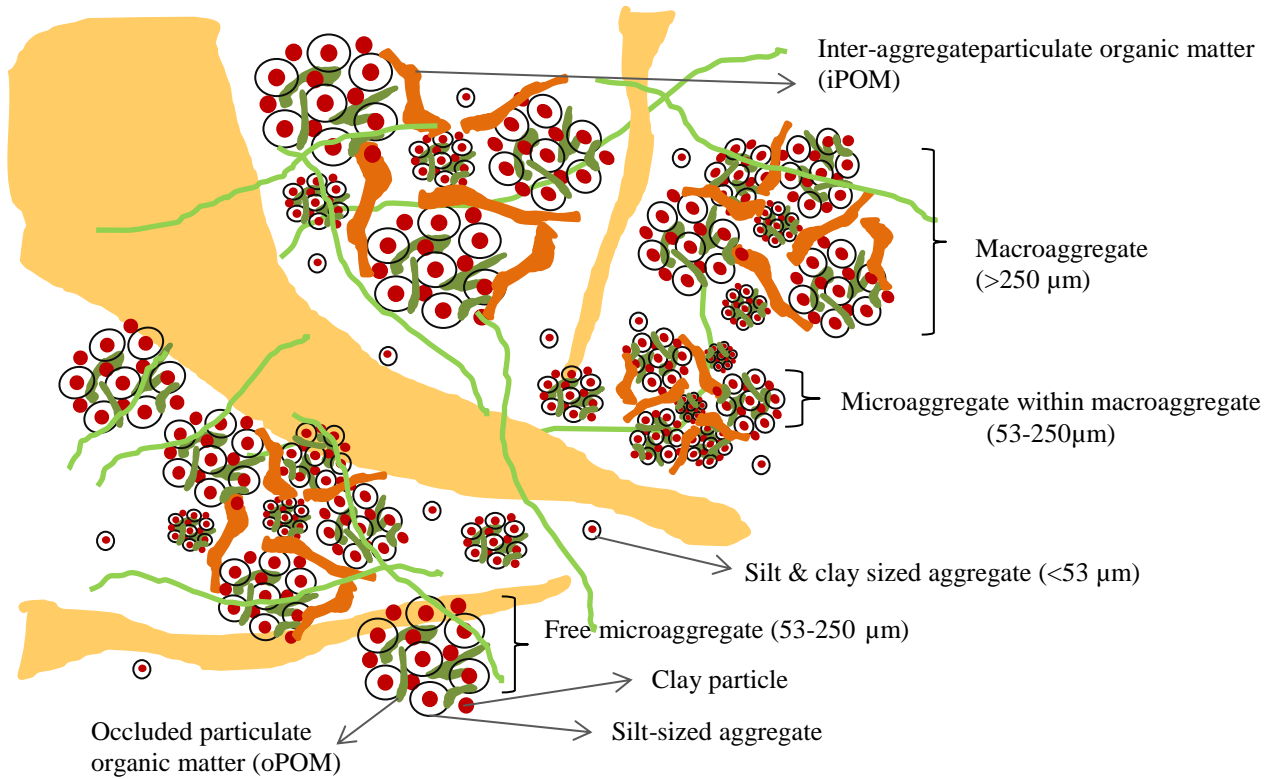

**Table SII. Description of soil subgroups distribution and characteristics in Ireland.**

| Soil Type                         | WRB Correlation | Diagnostic Description                                                                                                            | Coverage of grassland area (ha) | Indicative SOC to 1 m depth (t·ha <sup>-1</sup> ) |
|-----------------------------------|-----------------|-----------------------------------------------------------------------------------------------------------------------------------|---------------------------------|---------------------------------------------------|
| Typical Brown Earth (TBE)         | HaplicCambisol  | Well drained soils.                                                                                                               | 761,944 ha                      | 126.96 +/- 33.5                                   |
| Humic Brown Earth (HBE)           | HumicCambisol   | Well drained soils with a humose topsoil.                                                                                         | 43,139 ha                       | 124.43 +/- 30.9                                   |
| Stagnic Brown Earth (SBE)         | StagnicCambisol | Moderately drained soils with a slowly permeable sub-surface horizon.                                                             | 107,101 ha                      | 121.98 +/- 37.5                                   |
| Typical Luvisol (TLu)             | HaplicLuvisol   | Moderately drained soils due to clay illuviation, reducing permeability in the sub-surface horizon                                | 448,446 ha                      | 170.31 +/- 113.8                                  |
| StagnicLuvisol (SLu)              | StagnicLuvisol  | Imperfectly drained soils due to clay illuviation and gleying below 40 cm, as a result of a slowly permeable sub-surface horizon. | 140,864 ha                      | 108.89 +/- 22.0                                   |
| Typical Surface-water Gley (TSWG) | HaplicStagnosol | Poorly drained soils, with gleying within 40 cm, as a result of a slowly permeable sub-surface horizon.                           | 311,201 ha                      | 128.21 +/- 52.1                                   |

This information was synthesised from the Irish Soil Information System database and maps 41,45 .

**Figure SI2**

100 g subsample

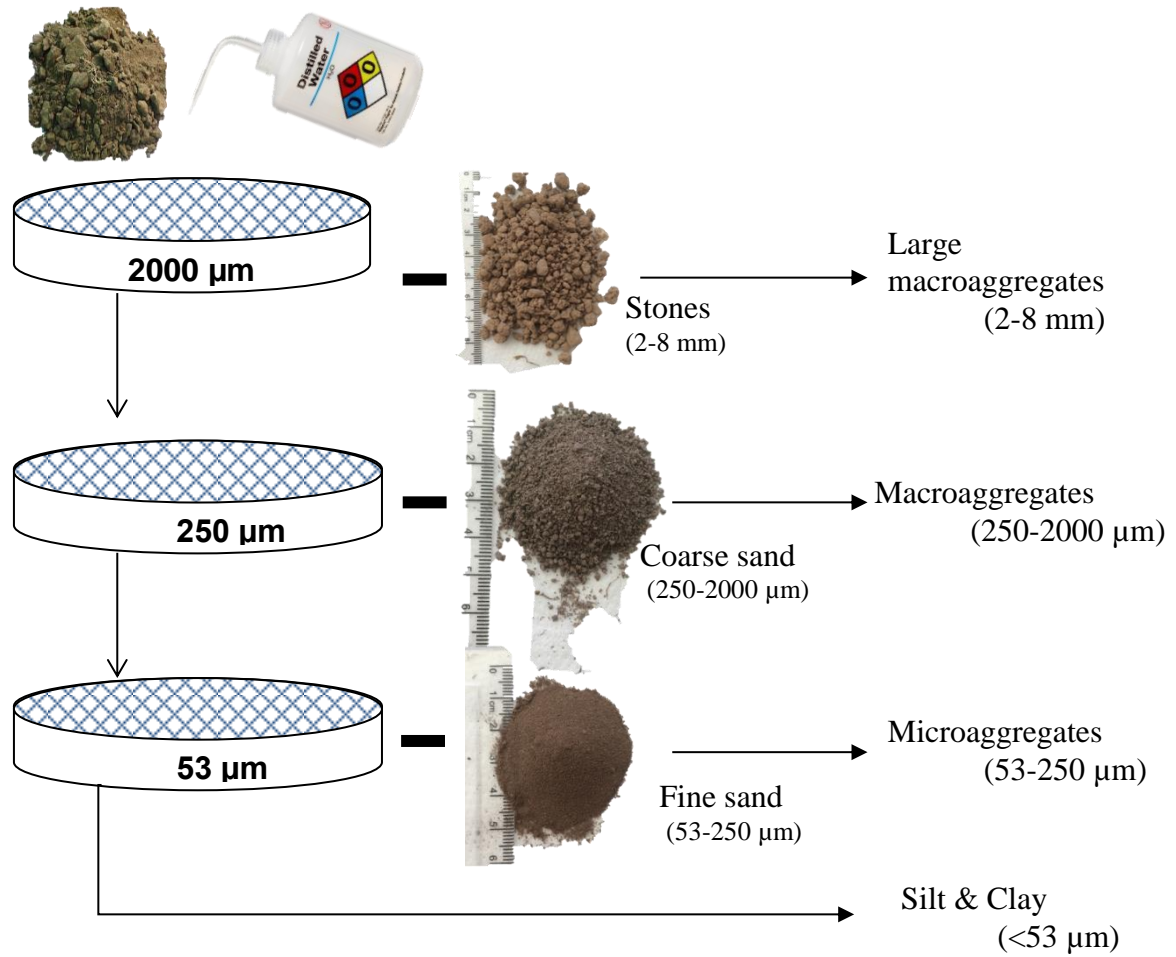

Method for aggregate fractionation adapted from Cambardella and Elliott, 1993

**Table SI2. Soil chemical and physical properties of each sample. Note: End depth 999 indicates that the pit was not deep enough to arrive at the end of the last horizon. Source: Massey et al., 2014<sup>42</sup>**

| Profile Number | Horizon | Soil type | Start depth | End depth | Base Saturation (%) | Cation Exchange Capacity (cmol kg <sup>-1</sup> ) | N (%) | C (%) | Corg (%) | pH   | Sand 200-005mm % w/w | Silt 0002 - 005mm % w/w | Clay <0002m m % w/w | Textural Class  | Bulk density g/cm <sup>3</sup> |
|----------------|---------|-----------|-------------|-----------|---------------------|---------------------------------------------------|-------|-------|----------|------|----------------------|-------------------------|---------------------|-----------------|--------------------------------|
| RC042          | 1       | TBE       | 0           | 25        | 94                  | 20.33                                             | 0.50  | 5.07  | 3.80     | 6.83 | 32                   | 36                      | 32                  | Clay Loam       | 0.83                           |
| RC042          | 2       | TBE       | 25          | 70        | 96                  | 6.53                                              | 0.16  | 1.52  | 0.79     | 7.04 | 57                   | 32                      | 11                  | Sandy Loam      | 1.09*                          |
| RC043          | 1       | TBE       | 0           | 20        | 85                  | 14.29                                             | 0.50  | 5.08  | 3.94     | 5.93 | 44                   | 28                      | 28                  | Clay Loam       | 0.79                           |
| RC043          | 2       | TBE       | 20          | 26        | 84                  | 10.79                                             | 0.29  | 3.14  | 2.01     | 6.09 | 40                   | 38                      | 22                  | Loam            | 1.12*                          |
| RC043          | 3       | TBE       | 26          | 58        | 85                  | 4.30                                              | 0.10  | 1.10  | 0.58     | 6.31 | 53                   | 32                      | 15                  | Sandy Loam      | 1.24*                          |
| RC043          | 4       | TBE       | 58          | 70        | 76                  | 3.54                                              | 0.06  | 0.72  | 0.34     | 6.42 | 62                   | 29                      | 9                   | Sandy Loam      | 1.37*                          |
| RC043          | 5       | TBE       | 70          | 90        | 77                  | 2.75                                              | 0.01  | 0.25  | 0.12     | 6.41 | 70                   | 23                      | 7                   | Sandy Loam      | 1.48*                          |
| RC056          | 1       | TBE       | 0           | 30        | 87                  | 13.70                                             | 0.35  | 3.75  | 2.74     | 6.16 | 61                   | 22                      | 17                  | Sandy Loam      | 0.86                           |
| RC056          | 2       | TBE       | 30          | 75        | 83                  | 7.19                                              | 0.25  | 2.86  | 2.04     | 6.15 | 61                   | 22                      | 17                  | Sandy Loam      | 1.12*                          |
| RC056          | 3       | TBE       | 75          | 999       | 100                 | 0.63                                              | 0.08  | 0.84  | 0.42     | 6.15 | 73                   | 18                      | 9                   | Sandy Loam      | 1.23*                          |
| RC060          | 1       | SLU       | 0           | 30        | 90                  | 13.78                                             | 0.22  | 2.13  | 1.71     | 6.34 | 40                   | 35                      | 25                  | Loam            | 1.30                           |
| RC060          | 2       | SLU       | 30          | 60        | 92                  | 16.01                                             | 0.07  | 0.49  | 0.36     | 7.58 | 28                   | 36                      | 36                  | Clay Loam       | 1.52                           |
| RC060          | 3       | SLU       | 60          | 80        | 100                 | 21.65                                             | 0.06  | 0.47  | 0.29     | 7.95 | 19                   | 42                      | 39                  | silty Clay Loam | 1.59                           |
| RC067          | 1       | TBE       | 20          | 35        |                     | 17.65                                             | 0.34  | 3.81  | 3.35     | 7.09 | 44                   | 35                      | 21                  | Sandy Loam      | 1.01*                          |
| RC067          | 2       | TBE       | 0           | 20        |                     | 12.51                                             | 0.20  | 2.69  | 2.37     | 7.23 | 56                   | 22                      | 22                  | Loam            | 1.12*                          |
| RC067          | 3       | TBE       | 95          | 999       |                     | 15.08                                             | 0.18  | 3.07  | 2.64     | 7.24 | 66                   | 19                      | 15                  | Clay Loam       | 0.42*                          |
| RC070          | 1       | HBE       | 0           | 9         | 97                  | 35.50                                             | 0.88  | 9.63  | 8.98     | 6.24 | 28                   | 38                      | 34                  | Clay Loam       | 0.68*                          |
| RC070          | 2       | HBE       | 9           | 25        | 99                  | 24.35                                             | 0.45  | 4.63  | 3.63     | 6.63 | 38                   | 33                      | 29                  | Clay Loam       | 1.03*                          |
| RC070          | 3       | HBE       | 25          | 55        |                     | 8.73                                              | 0.11  | 1.06  | 0.52     | 6.37 | 51                   | 34                      | 15                  | Loam            | 1.25*                          |
| RC070          | 4       | HBE       | 55          | 999       |                     | 4.67                                              | 0.21  | 0.53  | 0.28     | 6.28 | 63                   | 28                      | 9                   | Sandy Loam      | 1.34*                          |
| RC076          | 1       | SBE       | 0           | 27        | 100                 | 19.54                                             | 0.56  | 4.85  | 4.35     | 6.43 | 14                   | 50                      | 36                  | Silty Clay Loam | 0.94*                          |
| RC076          | 2       | SBE       | 27          | 47        | 94                  | 12.86                                             | 0.24  | 2.38  | 1.75     | 6.64 | 12                   | 52                      | 36                  | Silty Clay Loam | 0.52*                          |
| RC076          | 3       | SBE       | 47          | 63        | 100                 | 9.89                                              | 0.16  | 1.55  | 0.84     | 6.52 | 20                   | 55                      | 25                  | Silt Loam       | 0.84*                          |
| RC091          | 1       | TLU       | 0           | 11        | 86                  | 12.50                                             | 0.45  | 4.28  | 3.82     | 5.28 | 47                   | 26                      | 27                  | Silty Clay Loam | 1.04                           |
| RC091          | 2       | TLU       | 11          | 23        |                     | 10.61                                             | 0.21  | 1.79  | 1.55     | 5.95 | 55                   | 23                      | 22                  | Silty Clay Loam | 1.19                           |
| RC091          | 3       | TLU       | 23          | 40        |                     | 7.44                                              | 0.08  | 0.62  | 0.49     | 6.48 | 48                   | 25                      | 27                  | Sandy Clay Loam | 1.50                           |
| RC091          | 4       | TLU       | 40          | 60        | 98                  | 9.13                                              | 0.06  | 0.44  | 0.35     | 6.85 | 43                   | 28                      | 29                  | Clay Loam       | 1.49                           |
| RC092          | 1       | TBE       | 0           | 12        | 90                  | 12.18                                             | 0.52  | 4.81  | 4.08     | 5.11 | 26                   | 36                      | 38                  | Clay Loam       | 0.90                           |
| RC092          | 2       | TBE       | 12          | 30        | 94                  | 11.27                                             | 0.33  | 2.90  | 2.27     | 5.47 | 26                   | 39                      | 35                  | Clay Loam       | 1.17*                          |
| RC092          | 3       | TBE       | 30          | 60        | 86                  | 7.53                                              | 0.18  | 1.61  | 0.85     | 5.90 | 37                   | 35                      | 28                  | Clay Loam       | 1.23*                          |
| RC092          | 4       | TBE       | 60          | 85        | 91                  | 6.95                                              | 0.13  | 0.90  | 0.58     | 6.04 | 49                   | 26                      | 25                  | Sandy Clay Loam | 1.23*                          |
| RC096          | 1       | TSWG      | 0           | 13        | 100                 | 10.70                                             | 0.34  | 3.45  | 2.91     | 5.70 | 27                   | 41                      | 32                  | Clay Loam       | 0.97                           |

| Profile Number | Horizon | Soil type | Start depth | End depth | Base Saturation (%) | Cation Exchange Capacity (cmol kg <sup>-1</sup> ) | N (%) | C (%) | Corg (%) | pH   | Sand 200-005mm % w/w | Silt 0002 - 005mm % w/w | Clay <0002m m % w/w | Textural Class  | Bulk density g/cm <sup>3</sup> |
|----------------|---------|-----------|-------------|-----------|---------------------|---------------------------------------------------|-------|-------|----------|------|----------------------|-------------------------|---------------------|-----------------|--------------------------------|
| RC096          | 2       | TSWG      | 13          | 30        | 31                  | 5.85                                              | 0.13  | 1.05  | 0.67     | 5.08 | 32                   | 42                      | 26                  | Loam            | 1.19                           |
| RC096          | 3       | TSWG      | 30          | 70        | 37                  | 5.69                                              | 0.09  | 0.35  | 0.25     | 5.11 | 19                   | 46                      | 35                  | Silty Clay Loam | 1.2*                           |
| RC096          | 4       | TSWG      | 70          | 90        | 42                  | 3.67                                              | 0.07  | 0.28  | 0.20     | 5.12 | 30                   | 41                      | 29                  | Clay Loam       | 0.11*                          |
| RC096          | 5       | TSWG      | 90          | 999       | 44                  | 4.51                                              | 0.08  | 0.27  | 0.19     | 5.06 | 14                   | 64                      | 22                  | Silt Loam       | 1.41*                          |
| RC098          | 1       | HBE       | 0           | 15        | 79                  | 11.04                                             | 0.58  | 7.43  | 6.53     | 5.29 | 32                   | 37                      | 31                  | Clay Loam       | 0.78                           |
| RC098          | 2       | HBE       | 15          | 25        | 76                  | 6.84                                              | 0.26  | 3.29  | 2.62     | 5.24 | 35                   | 40                      | 25                  | Loam            | 1.07*                          |
| RC098          | 3       | HBE       | 25          | 45        | 55                  | 3.95                                              | 0.11  | 1.03  | 0.55     | 5.35 | 36                   | 42                      | 22                  | Loam            | 1.3*                           |
| RC098          | 4       | HBE       | 45          | 90        | 66                  | 3.08                                              | 0.10  | 0.53  | 0.30     | 5.43 | 42                   | 36                      | 22                  | Loam            | 1.32*                          |
| RC100          | 1       | SLU       | 0           | 25        | 100                 | 10.14                                             | 0.22  | 2.65  | 2.10     | 6.36 | 50                   | 31                      | 19                  | Loam            | 1.23                           |
| RC100          | 2       | SLU       | 25          | 60        | 100                 | 6.38                                              | 0.10  | 0.87  | 0.57     | 6.61 | 43                   | 36                      | 21                  | Loam            | 1.47                           |
| RC100          | 3       | SLU       | 60          | 999       | 55                  | 13.12                                             | 0.06  | 0.31  | 0.23     | 6.60 | 6                    | 51                      | 43                  | Silty Clay      | 1.47                           |
| RC105          | 1       | HBE       | 0           | 26        |                     | 17.97                                             | 0.44  | 7.26  | 6.64     | 5.98 | 44                   | 37                      | 19                  | Loam            | 0.86                           |
| RC105          | 2       | HBE       | 26          | 38        |                     | 13.23                                             | 0.18  | 4.45  | 4.01     | 6.30 | 47                   | 38                      | 15                  | Loam            | 0.96*                          |
| RC105          | 3       | HBE       | 38          | 999       | 92                  | 4.46                                              | 0.06  | 0.78  | 0.52     | 6.09 | 60                   | 32                      | 8                   | Sandy Loam      | 1.17*                          |
| RC107          | 1       | SBE       | 0           | 20        |                     | 11.03                                             | 0.31  | 2.95  | 2.33     | 6.11 | 41                   | 35                      | 24                  | Loam            | 1.12                           |
| RC107          | 2       | SBE       | 20          | 35        | 86                  | 8.12                                              | 0.19  | 1.97  | 1.40     | 5.57 | 37                   | 39                      | 24                  | Loam            | 1.11                           |
| RC107          | 3       | SBE       | 35          | 60        | 94                  | 5.83                                              | 0.08  | 1.11  | 0.54     | 6.01 | 48                   | 38                      | 14                  | Loam            | 0.83                           |
| RC107          | 4       | SBE       | 60          | 90        | 60                  | 3.69                                              | 0.11  | 1.69  | 0.82     | 5.92 | 49                   | 41                      | 10                  | Loam            | 0.99                           |
| RC107          | 5       | SBE       | 90          | 120       |                     | 1.11                                              | 0.03  | 0.21  | 0.13     | 6.14 | 50                   | 32                      | 18                  | Loam            | 1.47*                          |
| RC119          | 1       | SBE       | 0           | 15        | 82                  | 17.38                                             | 0.52  | 4.88  | 4.33     | 6.06 | 46                   | 33                      | 21                  | Loam            | 0.99                           |
| RC119          | 2       | SBE       | 15          | 40        | 71                  | 9.26                                              | 0.21  | 2.04  | 1.98     | 6.16 | 47                   | 36                      | 17                  | Loam            | 1.11                           |
| RC119          | 3       | SBE       | 40          | 55        | 58                  | 7.87                                              | 0.14  | 1.46  | 0.79     | 6.33 | 43                   | 39                      | 18                  | Loam            | 1.32*                          |
| RC119          | 4       | SBE       | 55          | 85        |                     | 1.20                                              | 0.04  | 0.40  | 0.23     | 6.51 | 54                   | 33                      | 13                  | Sandy Loam      | 1.42                           |
| RC119          | 5       | SBE       | 85          | 120       | 59                  | 2.69                                              | 0.03  | 0.16  | 0.10     | 6.73 | 59                   | 28                      | 13                  | Sandy Loam      | 1.53                           |
| RC123          | 1       | TLU       | 0           | 15        | 89                  | 15.12                                             | 0.31  | 2.85  | 2.44     | 6.96 | 32                   | 43                      | 25                  | Loam            | 1.11                           |
| RC123          | 2       | TLU       | 15          | 35        | 88                  | 14.59                                             | 0.31  | 2.85  | 2.65     | 6.88 | 29                   | 40                      | 31                  | Clay Loam       | 1.03                           |
| RC123          | 3       | TLU       | 35          | 65        | 76                  | 9.30                                              | 0.14  | 1.32  | 1.01     | 7.04 | 28                   | 46                      | 26                  | Loam            | 1.12                           |
| RC123          | 4       | TLU       | 65          | 75        | 78                  | 3.15                                              | 0.05  | 0.43  | 0.30     | 7.29 | 39                   | 47                      | 14                  | Loam            | 1.32*                          |
| RC123          | 5       | TLU       | 75          | 110       | 74                  | 3.75                                              | 0.05  | 0.28  | 0.17     | 7.40 | 38                   | 33                      | 29                  | Clay Loam       | 1.43*                          |
| RC129          | 1       | HBE       | 0           | 25        | 94                  | 16.34                                             | 0.42  | 5.60  | 4.93     | 5.66 | 38                   | 38                      | 24                  | Loam            | 0.81                           |
| RC129          | 2       | HBE       | 25          | 58        | 100                 | 6.07                                              | 0.11  | 1.37  | 0.91     | 6.15 | 43                   | 36                      | 21                  | Loam            | 1.10                           |
| RC129          | 3       | HBE       | 58          | 85        | 100                 | 3.40                                              | 0.06  | 0.76  | 0.44     | 6.07 | 51                   | 31                      | 18                  | Loam            | 1.31*                          |
| RC139          | 1       | TSWG      | 0           | 23        | 99                  | 2.55                                              | 0.18  | 1.98  | 1.50     | 5.18 | 62                   | 29                      | 9                   | Sandy Loam      | 1.27                           |

| Profile Number | Horizon | Soil type | Start depth | End depth | Base Saturation (%) | Cation Exchange Capacity (cmol kg <sup>-1</sup> ) | N (%) | C (%) | Corg (%) | pH   | Sand 200-005mm % w/w | Silt 0002 - 005mm % w/w | Clay <0002m m % w/w | Textural Class  | Bulk density g/cm <sup>3</sup> |
|----------------|---------|-----------|-------------|-----------|---------------------|---------------------------------------------------|-------|-------|----------|------|----------------------|-------------------------|---------------------|-----------------|--------------------------------|
| RC139          | 2       | TSWG      | 23          | 45        |                     | 0.79                                              | 0.02  | 0.21  | 0.16     | 6.60 | 56                   | 36                      | 8                   | Sandy Loam      | 1.76                           |
| RC139          | 3       | TSWG      | 45          | 120       |                     | 2.00                                              | 0.02  | 0.16  | 0.12     | 7.07 | 47                   | 43                      | 10                  | Loam            | 1.48*                          |
| RC142          | 1       | SLU       |             | 23        |                     | 10.41                                             | 0.24  | 3.30  | 2.49     | 6.21 | 69                   | 24                      | 7                   | Sandy Loam      | 0.97                           |
| RC142          | 2       | SLU       |             | 50        | 79                  | 4.21                                              | 0.07  | 0.93  | 0.42     | 6.07 | 55                   | 34                      | 11                  | Sandy Loam      | 1.16*                          |
| RC142          | 3       | SLU       |             | 90        |                     | 1.30                                              | 0.02  | 0.31  | 0.14     | 6.07 | 62                   | 32                      | 6                   | Sandy Loam      | 1.68*                          |
| RC143          | 1       | TBE       | 0           | 20        | 81                  | 6.51                                              | 0.26  | 2.81  | 2.30     | 5.68 | 56                   | 33                      | 11                  | Sandy Loam      | 1.02                           |
| RC143          | 2       | TBE       | 20          | 35        | 74                  | 5.59                                              | 0.14  | 1.55  | 0.90     | 6.23 | 54                   | 33                      | 13                  | Sandy Loam      | 1.15                           |
| RC143          | 3       | TBE       | 35          | 60        | 55                  | 3.72                                              | 0.11  | 1.16  | 0.49     | 5.85 | 58                   | 34                      | 8                   | Sandy Loam      | 1.06*                          |
| RC143          | 4       | TBE       | 60          | 80        | 53                  | 1.56                                              | 0.02  | 0.31  | 0.15     | 6.06 | 58                   | 36                      | 6                   | Sandy Loam      | 1.45*                          |
| RC143          | 5       | TBE       | 80          | 100       | 99                  | 0.94                                              | 0.01  | 0.20  | 0.11     | 6.05 | 49                   | 43                      | 8                   | Loam            | 1.5*                           |
| RC154          | 1       | TBE       | 0           | 55        | 75                  | 6.64                                              | 0.20  | 1.86  | 1.24     | 6.00 | 72                   | 17                      | 11                  | Sandy Loam      | 1.20                           |
| RC154          | 2       | TBE       | 55          | 95        | 88                  | 2.91                                              | 0.04  | 0.36  | 0.22     | 6.55 | 74                   | 16                      | 10                  | Sandy Loam      | 1.35                           |
| RC154          | 3       | TBE       | 95          | 125       |                     | 7.09                                              | 0.04  | 0.59  | 0.39     | 7.14 | 77                   | 17                      | 6                   | Loamy Sand      | 1.16                           |
| RC172          | 1       | TLU       | 0           | 22        | 100                 | 8.90                                              | 0.09  | 2.68  | 2.02     | 6.32 | 34                   | 41                      | 25                  | Loam            | 1.10                           |
| RC172          | 2       | TLU       | 22          | 35        | 84                  | 4.56                                              | 0.08  | 0.83  | 0.38     | 6.23 | 32                   | 46                      | 22                  | Loam            | 1.14                           |
| RC172          | 3       | TLU       | 35          | 60        | 94                  | 3.74                                              | 0.08  | 0.48  | 0.24     | 6.33 | 27                   | 46                      | 27                  | Clay Loam       | 1.33                           |
| RC172          | 4       | TLU       | 60          | 85        | 99                  | 3.65                                              | 0.08  | 0.37  | 0.19     | 6.35 | 66                   | 21                      | 13                  | Sandy Loam      | 1.34                           |
| RC172          | 5       | TLU       | 85          | 100       | 100                 | 3.25                                              | 0.37  | 0.18  | 0.10     | 6.30 | 35                   | 42                      | 23                  | Loam            | 1.6*                           |
| RC173          | 1       | SBE       | 0           | 28        | 78                  | 8.87                                              | 0.16  | 3.38  | 2.70     | 5.36 | 29                   | 37                      | 34                  | Clay Loam       | 1.11                           |
| RC173          | 2       | SBE       | 28          | 45        | 96                  | 6.97                                              | 0.16  | 1.10  | 0.89     | 5.98 | 31                   | 41                      | 28                  | Clay Loam       | 1.13*                          |
| RC173          | 3       | SBE       | 45          | 65        | 96                  | 4.51                                              | 0.15  | 1.23  | 0.73     | 5.95 | 53                   | 23                      | 24                  | Sandy Clay Loam | 1.36*                          |
| RC173          | 4       | SBE       | 65          | 70        | 94                  | 5.34                                              | 0.13  | 0.61  | 0.31     | 5.92 | 25                   | 46                      | 29                  | Clay Loam       | 1.59*                          |
| RC182          | 1       | SBE       | 0           | 15        | 91                  | 13.66                                             | 0.54  | 6.16  | 5.23     | 5.61 | 44                   | 26                      | 30                  | Clay loam       | 0.74                           |
| RC182          | 2       | SBE       | 15          | 25        |                     | 7.60                                              | 0.31  | 3.57  | 2.57     | 5.90 | 47                   | 28                      | 25                  | Loam            | 0.89                           |
| RC182          | 3       | SBE       | 25          | 42        |                     | 2.23                                              | 0.15  | 1.67  | 0.72     | 5.97 | 55                   | 30                      | 15                  | Sandy loam      | 0.94                           |
| RC182          | 4       | SBE       | 42          | 75        | 96                  | 1.40                                              | 0.03  | 0.25  | 0.10     | 6.19 | 63                   | 26                      | 11                  | Sandy loam      | 1.49*                          |
| RC184          | 1       | TSWG      | 0           | 12        | 95                  | 10.89                                             | 0.62  | 6.74  | 5.48     | 5.52 | 41                   | 26                      | 33                  | Clay loam       | 0.86                           |
| RC184          | 2       | TSWG      | 12          | 30        | 83                  | 7.74                                              | 0.40  | 4.06  | 3.01     | 5.71 | 39                   | 31                      | 30                  | clay loam       | 1.01                           |
| RC184          | 3       | TSWG      | 30          | 49        | 97                  | 3.56                                              | 0.10  | 0.87  | 0.57     | 5.90 | 52                   | 26                      | 22                  | Sandy Clay Loam | 1.17                           |
| RC184          | 4       | TSWG      | 49          | 104       | 57                  | 9.81                                              | 0.05  | 0.21  | 0.14     | 5.61 | 46                   | 24                      | 30                  | Sandy Clay Loam | 1.66                           |
| RC186          | 1       | TSWG      | 0           | 22        | 96                  | 8.64                                              | 0.46  | 5.28  | 4.10     | 5.60 | 39                   | 28                      | 33                  | clay loam       | 0.96                           |
| RC186          | 2       | TSWG      | 22          | 50        | 92                  | 5.22                                              | 0.09  | 0.95  | 0.86     | 5.96 | 35                   | 38                      | 27                  | Clay Loam/Loam  | 1.49                           |
| RC186          | 3       | TSWG      | 50          | 95        |                     | 3.40                                              | 0.05  | 0.26  | 0.12     | 5.71 | 46                   | 31                      | 23                  | Loam            | 1.42                           |

| Profile Number | Horizon | Soil type | Start depth | End depth | Base Saturation (%) | Cation Exchange Capacity (cmol kg <sup>-1</sup> ) | N (%) | C (%) | Corg (%) | pH   | Sand 200-005mm % w/w | Silt 0002 - 005mm % w/w | Clay <0002m m % w/w | Textural Class  | Bulk density g/cm <sup>3</sup> |
|----------------|---------|-----------|-------------|-----------|---------------------|---------------------------------------------------|-------|-------|----------|------|----------------------|-------------------------|---------------------|-----------------|--------------------------------|
| RC186          | 4       | TSWG      | 95          | 135       | 87                  | 12.24                                             | 0.07  | 0.15  | 0.11     | 6.42 | 44                   | 28                      | 28                  | Clay Loam       | 1.57                           |
| RC187          | 1       | HBE       | 0           | 21        | 100                 | 19.05                                             | 0.64  | 6.67  | 6.12     | 6.44 | 58                   | 26                      | 16                  | Sandy Loam      | 0.63                           |
| RC187          | 2       | HBE       | 21          | 32        | 100                 | 6.07                                              | 0.15  | 1.53  | 0.92     | 6.44 | 27                   | 64                      | 9                   | Sandy Loam      | 0.58*                          |
| RC189          | 1       | SBE       | 0           | 22        | 73                  | 14.80                                             | 0.49  | 5.92  | 4.23     | 5.33 | 56                   | 23                      | 21                  | Sandy Clay Loam | 0.78                           |
| RC189          | 2       | SBE       | 22          | 37        | 85                  | 9.92                                              | 0.27  | 3.20  | 2.62     | 5.44 | 58                   | 24                      | 18                  | Sandy Loam      | 1.07*                          |
| RC189          | 3       | SBE       | 37          | 65        |                     | 5.80                                              | 0.06  | 0.43  | 0.26     | 5.86 | 75                   | 14                      | 11                  | Sandy Loam      | 1.35*                          |
| RC215          | 1       | TSWG      | 0           | 30        | 77                  | 4.91                                              | 0.19  | 2.21  | 1.78     | 5.29 | 68                   | 22                      | 10                  | Sandy Loam      | 1.41                           |
| RC215          | 2       | TSWG      | 30          | 48        |                     | 3.54                                              | 0.12  | 0.87  | 0.66     | 6.02 | 59                   | 26                      | 15                  | Sandy Loam      | 1.52                           |
| RC215          | 3       | TSWG      | 48          | 90        |                     | 2.01                                              | 0.06  | 0.67  | 0.32     | 5.96 | 56                   | 28                      | 16                  | Sandy Loam      | 1.49                           |
| RC215          | 4       | TSWG      | 90          | 115       |                     | 0.89                                              | 0.02  | 0.16  | 0.07     | 5.99 | 75                   | 14                      | 11                  | Sandy Loam      | 1.73                           |
| RC220          | 1       | HBE       | 0           | 23        | 92                  | 15.36                                             | 0.63  | 7.63  | 6.40     | 5.51 | 35                   | 30                      | 35                  | Clay Loam       | 0.75                           |
| RC220          | 2       | HBE       | 23          | 45        | 93                  | 6.72                                              | 0.21  | 2.44  | 1.15     | 5.65 | 35                   | 43                      | 22                  | Loam            | 0.83                           |
| RC220          | 3       | HBE       | 45          | 75        | 100                 | 1.01                                              | 0.07  | 0.42  | 0.21     | 6.00 | 47                   | 34                      | 19                  | Loam            | 1.19                           |
| RC224          | 1       | TSWG      | 48          | 125       | 74                  | 6.51                                              | 0.60  | 6.20  | 5.31     | 5.16 | 20                   | 40                      | 40                  | Clay/Silty      | 1.48                           |
| RC224          | 2       | TSWG      | 33          | 48        | 78                  | 4.35                                              | 0.28  | 2.40  | 1.93     | 5.42 | 18                   | 45                      | 37                  | Silty Clay Loam | 0.86                           |
| RC224          | 3       | TSWG      | 0           | 10        | 44                  | 5.98                                              | 0.16  | 0.98  | 0.61     | 5.52 | 29                   | 42                      | 29                  | Clay Loam       | 0.99                           |
| RC224          | 4       | TSWG      | 10          | 33        | 47                  | 4.19                                              | 0.08  | 0.27  | 0.16     | 5.59 | 46                   | 36                      | 18                  | Loam            | 0.09*                          |

Figure SI3. Map of sites location through the Republic of Ireland. The map was created in ArcGIS v.10.2 (ESRI Inc., Redwoods, USA) and used to create the studied points map representation. (<https://www.arcgis.com>)

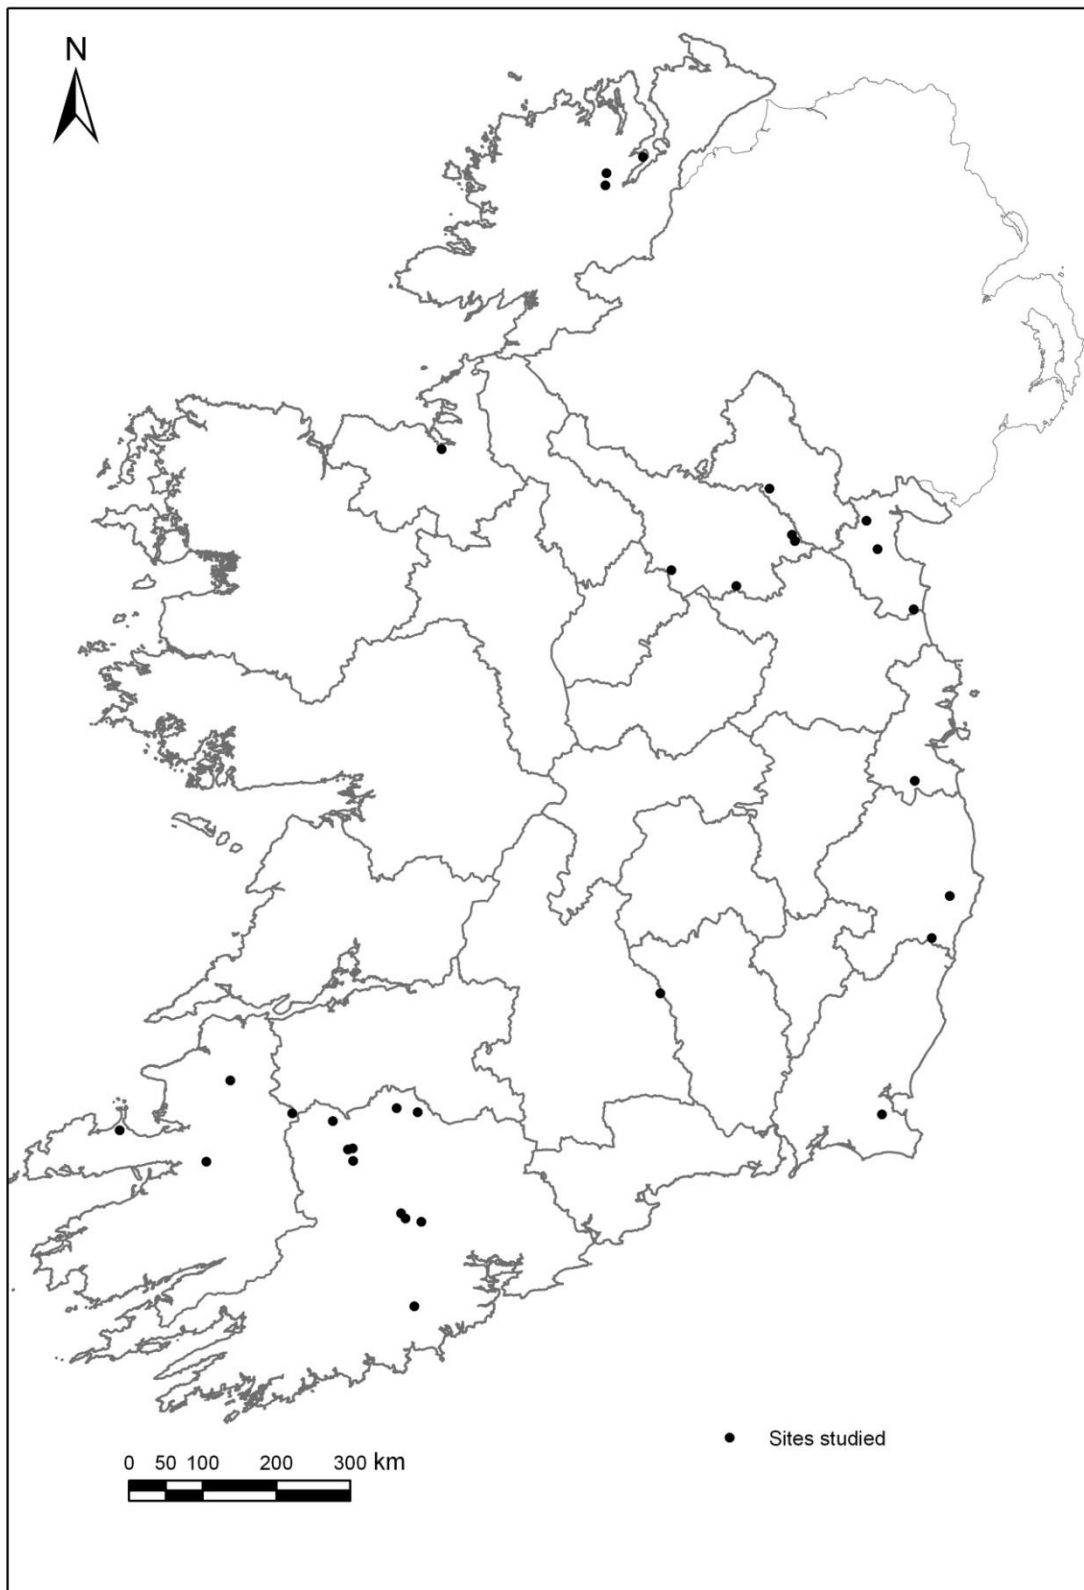

Supplement: srep45635-s1.pdf [file srep45635-s1.pdf]
